# Supplementary material for: A randomised controlled trial investigating motor skill training as a function of attentional focus in old age
Source: PubMed Central journal article supplement (PMC2684534; doi:10.1186/1471-2318-9-15), 2009-05-08
Supplement: 1471-2318-9-15-S1.pdf [file 1471-2318-9-15-S1.pdf]

| Week | Task                                                                                                                                                                                                                                                                                                                                                                                                                                                                     | Surface                                                                                                                    | Imposed constraint                                                                                                                                                                                     |
|------|--------------------------------------------------------------------------------------------------------------------------------------------------------------------------------------------------------------------------------------------------------------------------------------------------------------------------------------------------------------------------------------------------------------------------------------------------------------------------|----------------------------------------------------------------------------------------------------------------------------|--------------------------------------------------------------------------------------------------------------------------------------------------------------------------------------------------------|
| 1    | <p>Single goal task: weight-shifting in seated or standing position within broad parallel lines (Note: all participants were able to perform the task in standing position):</p> <p>Task self paced with 100% visual feedback.</p> <p>Weight shifting modes</p> <ul style="list-style-type: none"> <li>• Anterior-posterior (1 Min)</li> <li>• Medio-lateral (1 Min)</li> <li>• Left &amp; right diagonal (1 Min)</li> </ul> <p>LOS training (5 Min)</p> <p>LOS Test</p> | <p>Broad standing position; Stable surface for weight shifting exercise; unstable surface for LOS training &amp; test.</p> | <p>No external constraints imposed</p>                                                                                                                                                                 |
| 2    | <p>Single goal task: weight-shifting in seated or standing position within broad parallel lines:</p> <p>Task self paced with 100% visual feedback.</p> <p>Weight shifting modes</p>                                                                                                                                                                                                                                                                                      | <p>Broad standing position; Stable surface for weight shifting exercise; unstable surface for LOS training &amp; test.</p> | <p>During training of weight shifting tasks the parallel lines will be smaller (this in contrast to the test condition where the degree of difficulty was kept constant for the 5-week study time)</p> |

|   |                                                                                                                                                                                                                                                                                                                                                                                                          |                                                                                                                                |                                                                                                                                                                                      |
|---|----------------------------------------------------------------------------------------------------------------------------------------------------------------------------------------------------------------------------------------------------------------------------------------------------------------------------------------------------------------------------------------------------------|--------------------------------------------------------------------------------------------------------------------------------|--------------------------------------------------------------------------------------------------------------------------------------------------------------------------------------|
|   | <ul style="list-style-type: none"> <li>• Anterior-posterior (1 Min)</li> <li>• Medio-lateral (1 Min)</li> <li>• Left &amp; right diagonal (1 Min)</li> </ul> <p>LOS training (5 Min)</p> <p>LOS Test</p>                                                                                                                                                                                                 |                                                                                                                                |                                                                                                                                                                                      |
| 3 | <p>Single goal task: weight-shifting in standing position within broad parallel lines:</p> <p>Task self paced with 100% visual feedback during test condition.</p> <p>Weight shifting modes</p> <ul style="list-style-type: none"> <li>• Anterior-posterior (1 Min)</li> <li>• Medio-lateral (1 Min)</li> <li>• Left &amp; right diagonal (1 Min)</li> </ul> <p>LOS training (5 Min)</p> <p>LOS Test</p> | <p>Variable standing positions; Stable surface for weight shifting exercise; unstable surface for LOS training &amp; test.</p> | <p>Manipulate stance positions<sup>†</sup> (base of support); ask performer to halve the broad standing position</p> <p>Impose time constraint during weight shifting exercises.</p> |
| 4 | <p>Single goal task: weight-shifting in standing position within various parallel lines:</p> <p>Task self paced with 100% visual</p>                                                                                                                                                                                                                                                                     | <p>Unstable surface conditions</p>                                                                                             | <p>Manipulate stance positions (base of support); ask performer to either halve the broad standing position or to take a semi-tandem position</p>                                    |

|   |                                                                                                                                                                                                                                                                                                                                                                                                          |                             |                                                                                                                                                                                                                                                                                              |
|---|----------------------------------------------------------------------------------------------------------------------------------------------------------------------------------------------------------------------------------------------------------------------------------------------------------------------------------------------------------------------------------------------------------|-----------------------------|----------------------------------------------------------------------------------------------------------------------------------------------------------------------------------------------------------------------------------------------------------------------------------------------|
|   | <p>feedback during test condition.</p> <p>Weight shifting modes</p> <ul style="list-style-type: none"> <li>• Anterior-posterior (1 Min)</li> <li>• Medio-lateral (1 Min)</li> <li>• Left &amp; right diagonal (1 Min)</li> </ul> <p>LOS training (5 Min)</p> <p>LOS Test</p>                                                                                                                             |                             | <p>Impose time constraint during weight shifting exercises.</p> <p>Manipulate sensory information (standing on foam during training).</p>                                                                                                                                                    |
| 5 | <p>Single goal task: weight-shifting in standing position within broad parallel lines:</p> <p>Task self paced with 100% visual feedback during test condition.</p> <p>Weight shifting modes</p> <ul style="list-style-type: none"> <li>• Anterior-posterior (1 Min)</li> <li>• Medio-lateral (1 Min)</li> <li>• Left &amp; right diagonal (1 Min)</li> </ul> <p>LOS training (5 Min)</p> <p>LOS Test</p> | Unstable surface conditions | <p>Manipulate stance positions (base of support); ask performer to either halve the broad standing position or to take a semi-tandem position.</p> <p>Impose time constraint during weight shifting exercises.</p> <p>Manipulate sensory information (standing on foam during training).</p> |

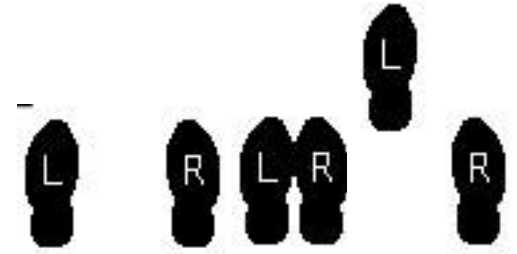

---

<sup>†</sup> Manipulation of the stance position. Subjects started with a hip wide foot standing position and progressively narrow their base of support through side-by-side standing(middle) and/or semi-tandem standing position (right). All subjects were able to progress to all stages.

---
